# Supplementary material for: Appraisal on the Wound Healing Potential of Deverra tortuosa DC. and Deverra triradiata Hochst Essential Oil Nanoemulsion Topical Preparation
Source: PubMed Central journal article supplement (PMC9360601; doi:10.3389/fphar.2022.940988), 2022-07-26
Supplement: DataSheet1.pdf [file DataSheet1.pdf]

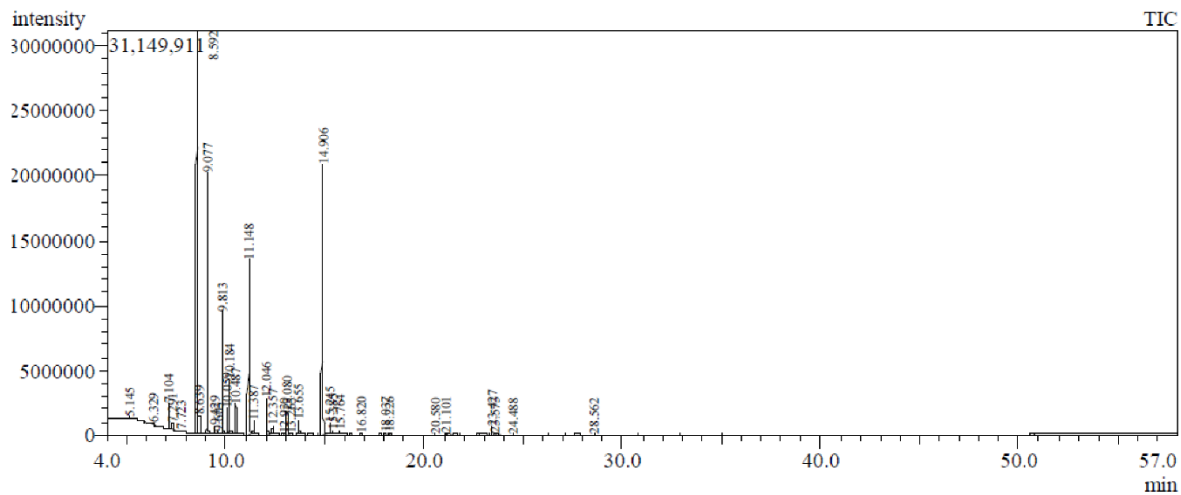

Figure S1: GC/MS Chromatogram for *D. tortuosa* essential oil extracted by HD method

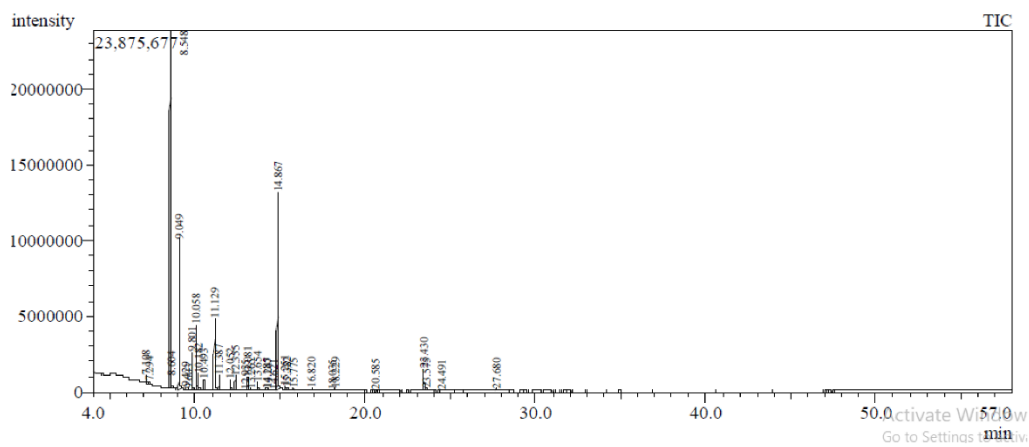

Figure S2: GC/MS Chromatogram for *D. tortuosa* essential oil extracted by MAHD method

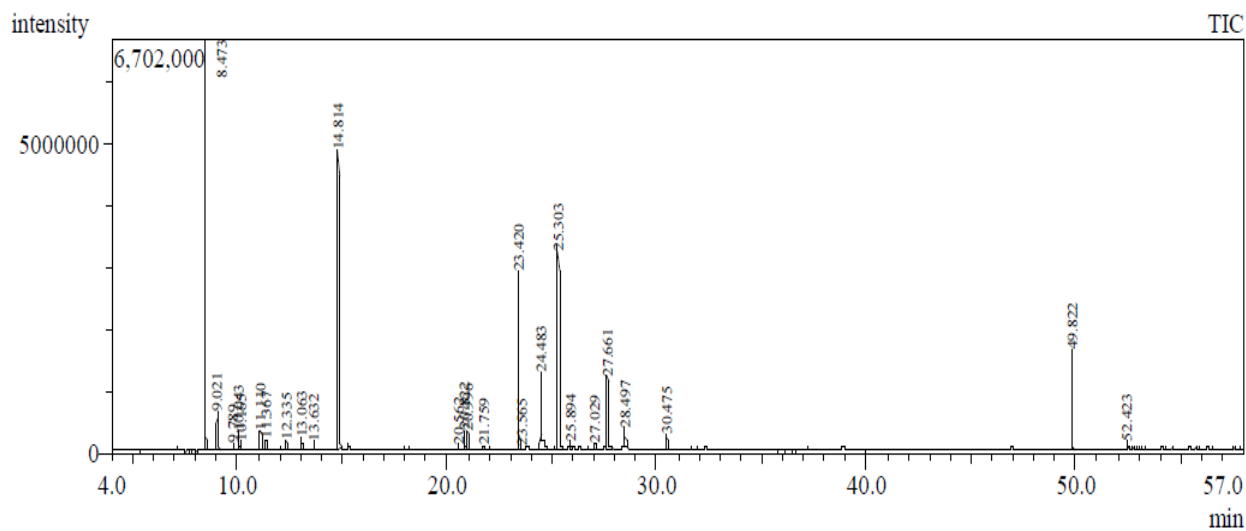

**Figure S3: GC/MS Chromatogram for *D. tortuosa* essential oil extracted by SFE method**

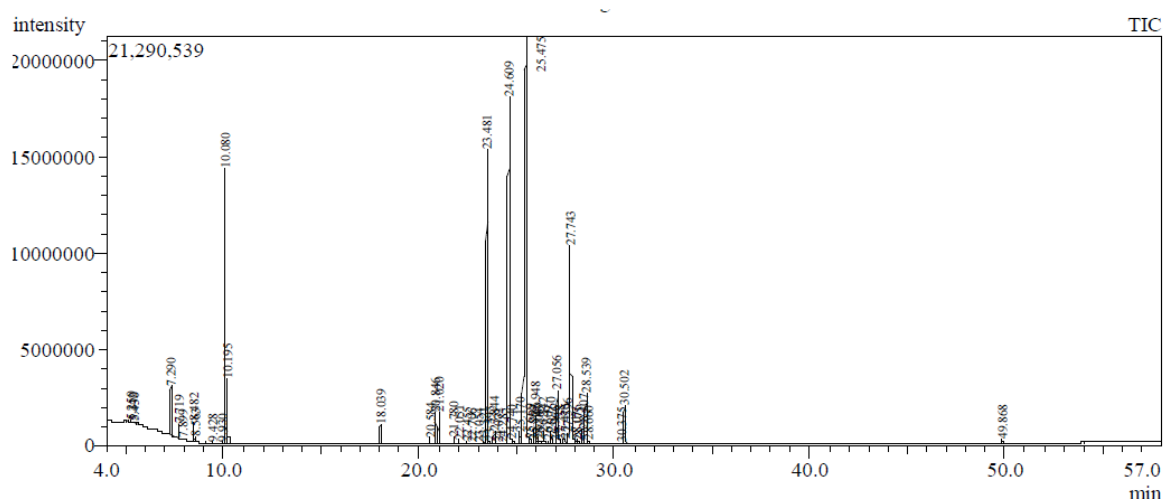

**Figure S4: GC/MS Chromatogram for *D. triradiata* extracted by HD method**

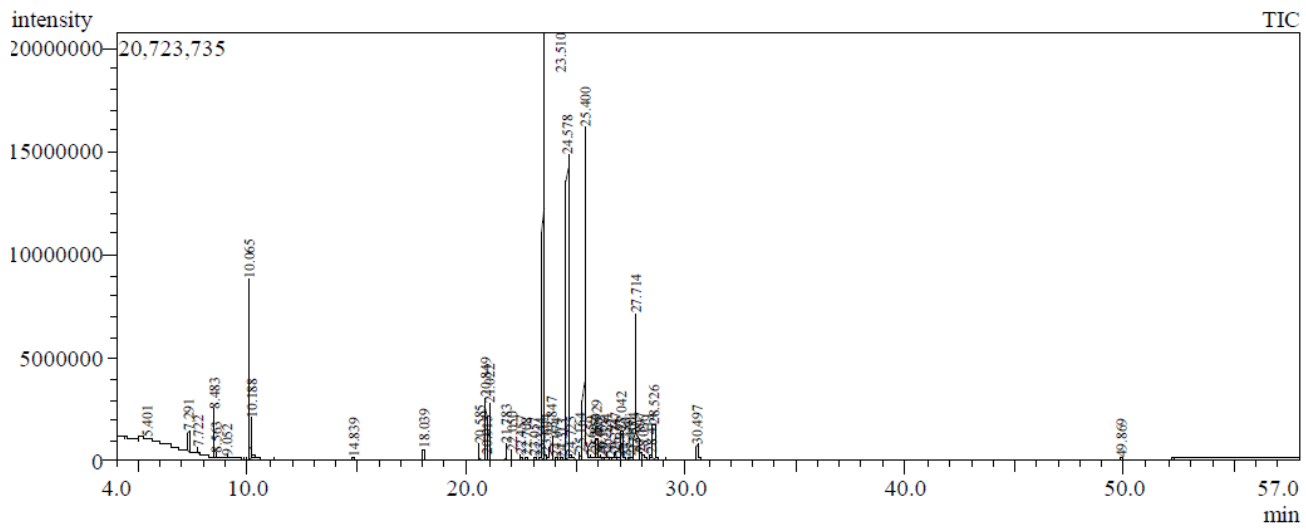

**Figure S5: GC/MS Chromatogram for *D. triradiata* extracted by MAHD method**

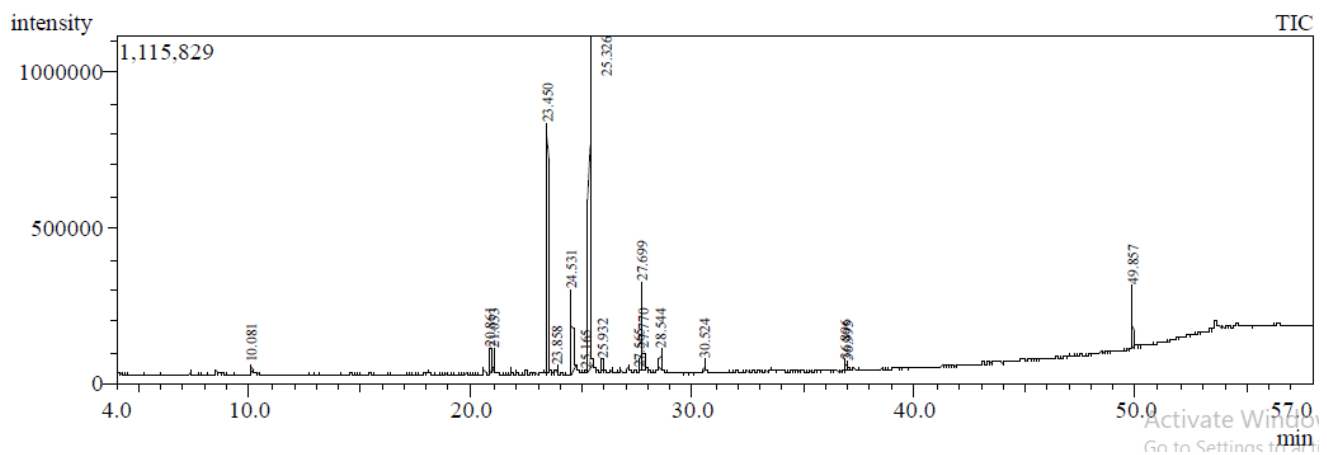

**Figure S6: GC/MS Chromatogram for *D. triradiata* extracted by SFE method**

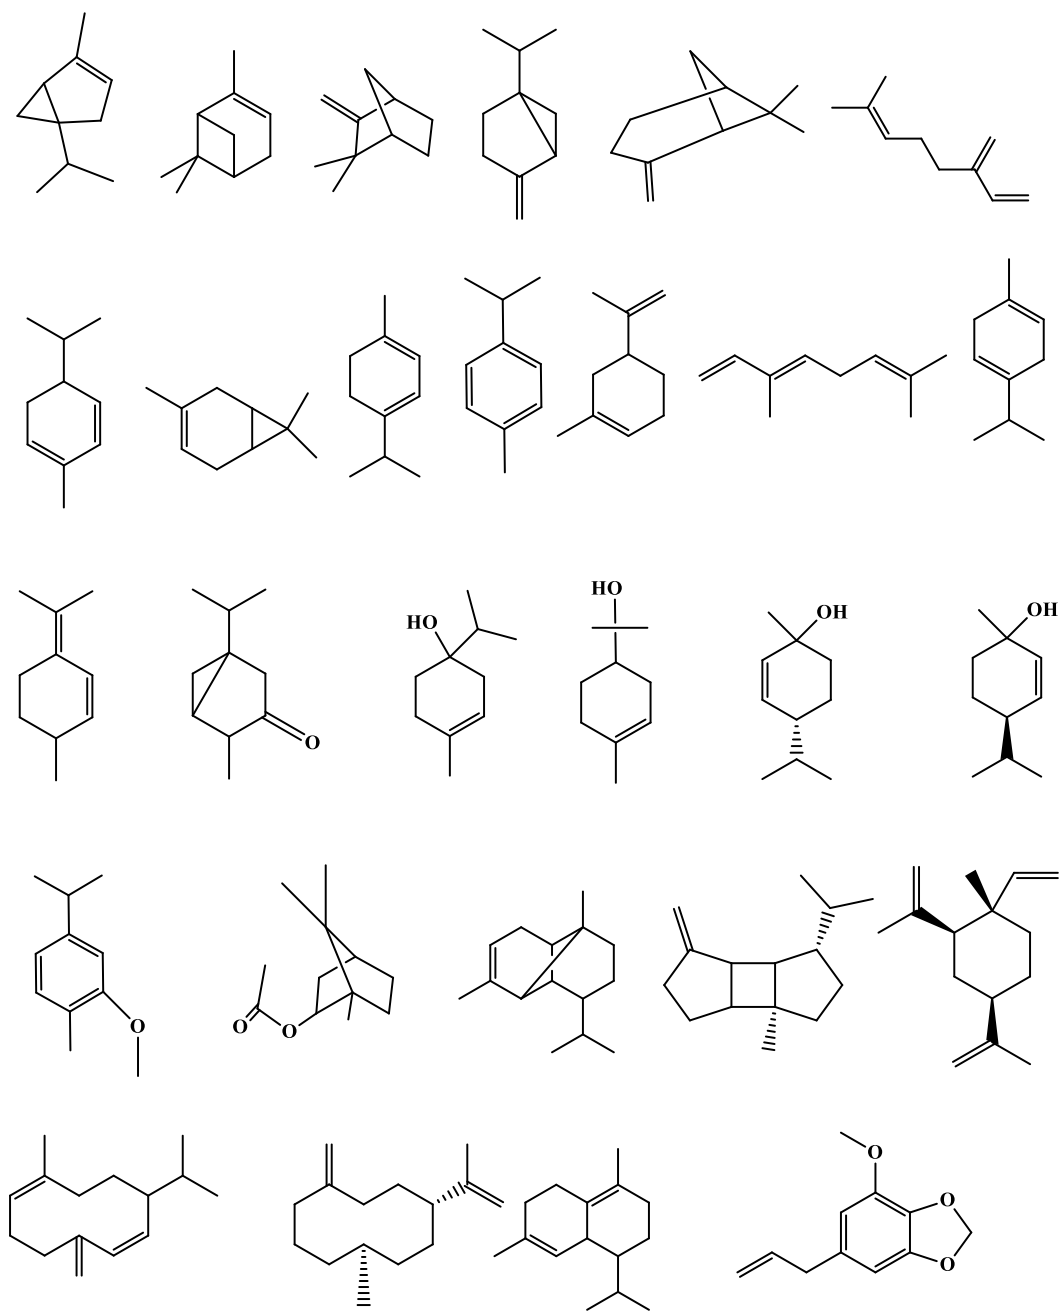

**Figure S7: Structures of the compounds detected in the HD, MAHD and SFE oil samples extracted from the aerial parts of *D. tortuosa* DC**

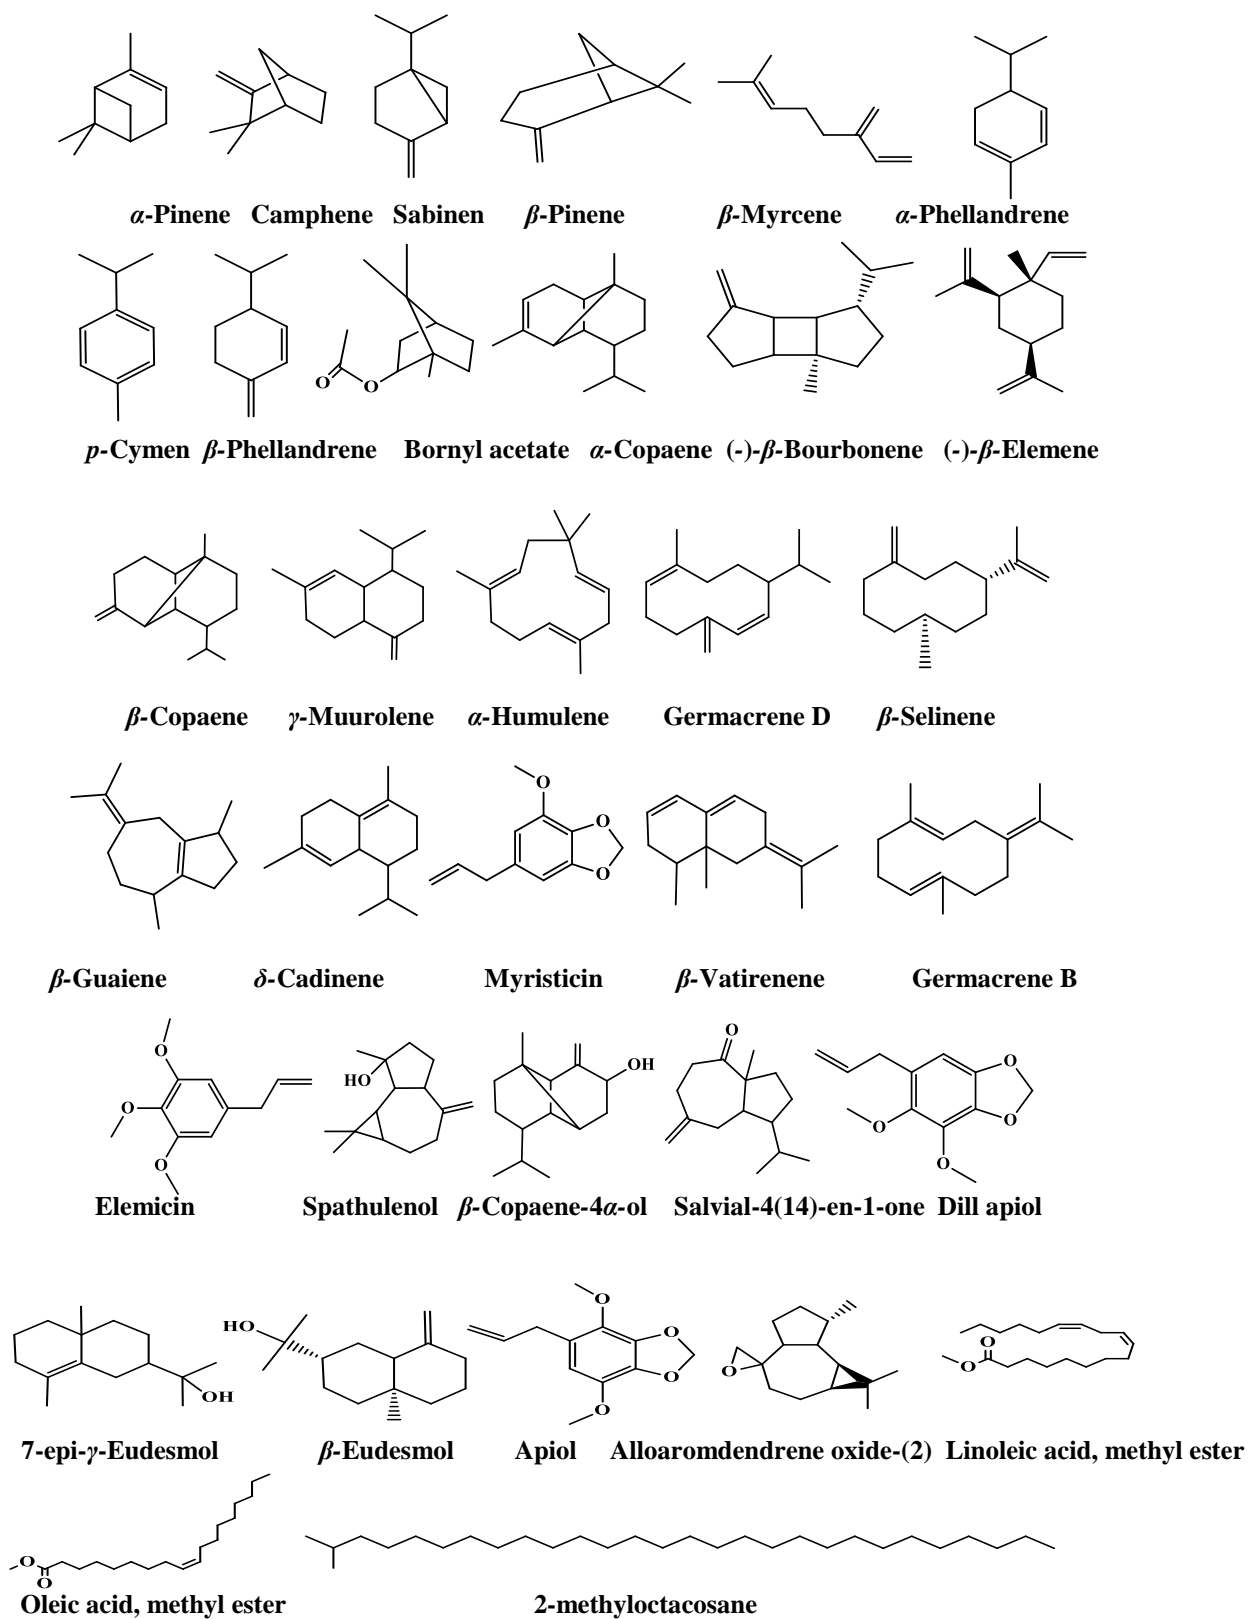

**Figure S8: Structures of the compounds detected in the HD, MAHD and SFE oil samples extracted from the aerial parts of *D. triradiata* Hochst.**
